# Supplementary material for: Isotopic composition of nitrate and particulate organic matter in a pristine dam reservoir of western India: implications for biogeochemical processes
Source: Copernicus journal article supplement (doi:10.5194/bg-14-767-2017), 2017-02-20

Supplement of Biogeosciences, 14, 767–779, 2017  
<http://www.biogeosciences.net/14/767/2017/>  
doi:10.5194/bg-14-767-2017-supplement  
© Author(s) 2017. CC Attribution 3.0 License.

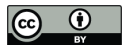

*Supplement of*

## **Isotopic composition of nitrate and particulate organic matter in a pristine dam reservoir of western India: implications for biogeochemical processes**

**Pratirupa Bardhan et al.**

*Correspondence to:* Pratirupa Bardhan (pratirupabardhan@gmail.com)

The copyright of individual parts of the supplement might differ from the CC-BY 3.0 licence.

**Table 1: Watershed characteristics of Tillari Reservoir (Source :**

<http://www.cwc.nic.in/main/downloads/National%20Register%20of%20Large%20dams%202009.pdf>).

| Year of completion | Type               | Ht. above lowest foundation | Length of dam | Gross storage capacity                | Reservoir area                         | Effective storage capacity              |
|--------------------|--------------------|-----------------------------|---------------|---------------------------------------|----------------------------------------|-----------------------------------------|
| 2006               | Earthfill /Gravity | 73 m                        | 943 m         | 9274 x 10 <sup>3</sup> m <sup>3</sup> | 16250 x 10 <sup>3</sup> m <sup>2</sup> | 447290 x 10 <sup>3</sup> m <sup>3</sup> |

**Supplementary Figure 1 Scatter plot between  $\delta^{18}\text{O-NO}_3^-$  vs.  $\delta^{15}\text{N-NO}_3^-$  of the surface samples during summer. A nearly 1:1 line indicates occurrence of nitrate assimilation.**

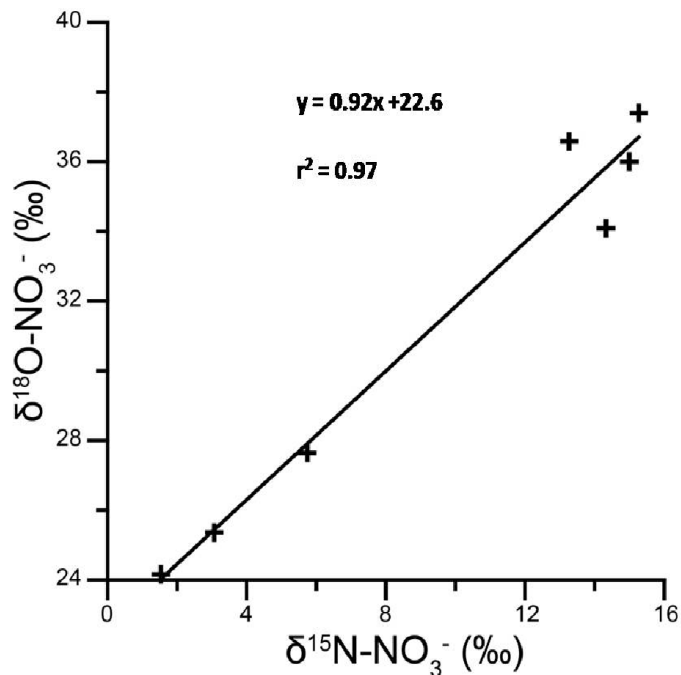

Supplement: Supplementary file 1 [file bg-14-767-2017-supplement.pdf]
